# Supplementary material for: GaN/MgI2 van der Waals heterostructure: a two-factor tunable photocatalyst for hydrogen evolution
Source: Royal Society of Chemistry journal article supplement (doi:10.1039/d2cp01456d), 2022-01-01
Supplement: d2cp01456d1.pdf [file d2cp01456d1.pdf]

Supporting Information for

## **GaN/MgI<sub>2</sub> van der Waals heterostructure: a two-factor tunable photocatalyst for hydrogen evolution**

Hua Zhu<sup>1</sup>, Yang Shen<sup>1, \*</sup>, Qianglong Fang<sup>1</sup>, Xiaodong Yang<sup>2, \*</sup>,

Liang Chen<sup>1, \*\*</sup>, and Shiqing Xu<sup>1</sup>

<sup>1</sup> *Institute of Optoelectronics Technology, China Jiliang University, Hangzhou 310018, China*

<sup>2</sup> *Key Laboratory of Ecophysics and Department of Physics, Shihezi University, Xinjiang 832003, China*

**\*Corresponding authors:** Y. Shen ([yshen@cjlu.edu.cn](mailto:yshen@cjlu.edu.cn)), X.D. Yang ([yangxiaodong1209@hotmail.com](mailto:yangxiaodong1209@hotmail.com)) and L. Chen ([lchen@cjlu.edu.cn](mailto:lchen@cjlu.edu.cn)).

## S1. Convergence test of k-point mesh

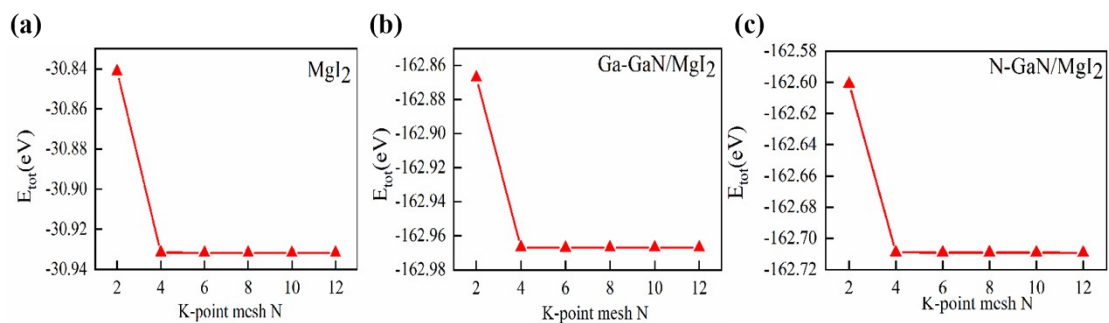

**Figure S1.** Total energies ( $E_{tot}$ ) of (a) pristine  $MgI_2$  monolayer, (b)  $MgI_2$ /Ga-GaN heterostructure, and (c)  $MgI_2$ /N-GaN heterostructure with different k-point mesh  $N$  (i.e.,  $N \times N \times 1$ ).

## S2. Band structures of hydrogenated GaN nanosheets

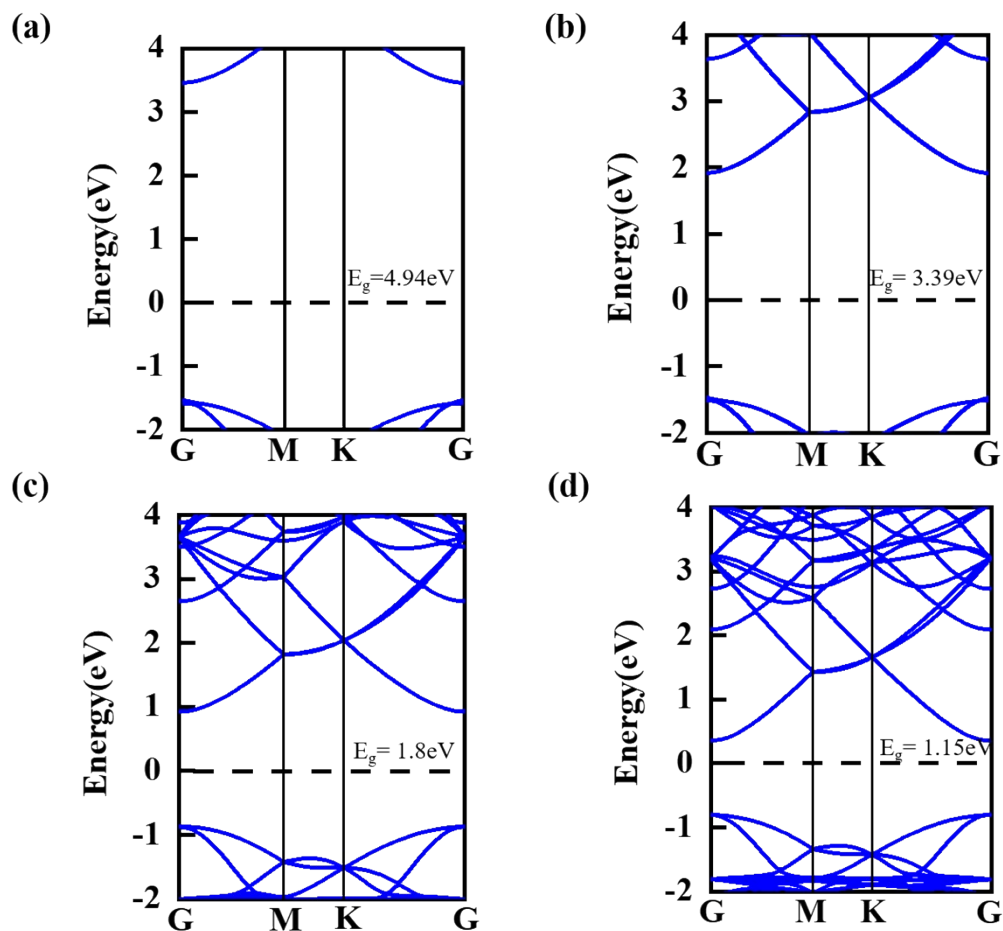

**Figure S2.** Band structure of (a) monolayer, (b) bilayer, (c) trilayer, and (d) tetralayer GaN nanosheets obtained using the HSE06 functional.

### S3. the different stacking patten of GaN/MgI<sub>2</sub>

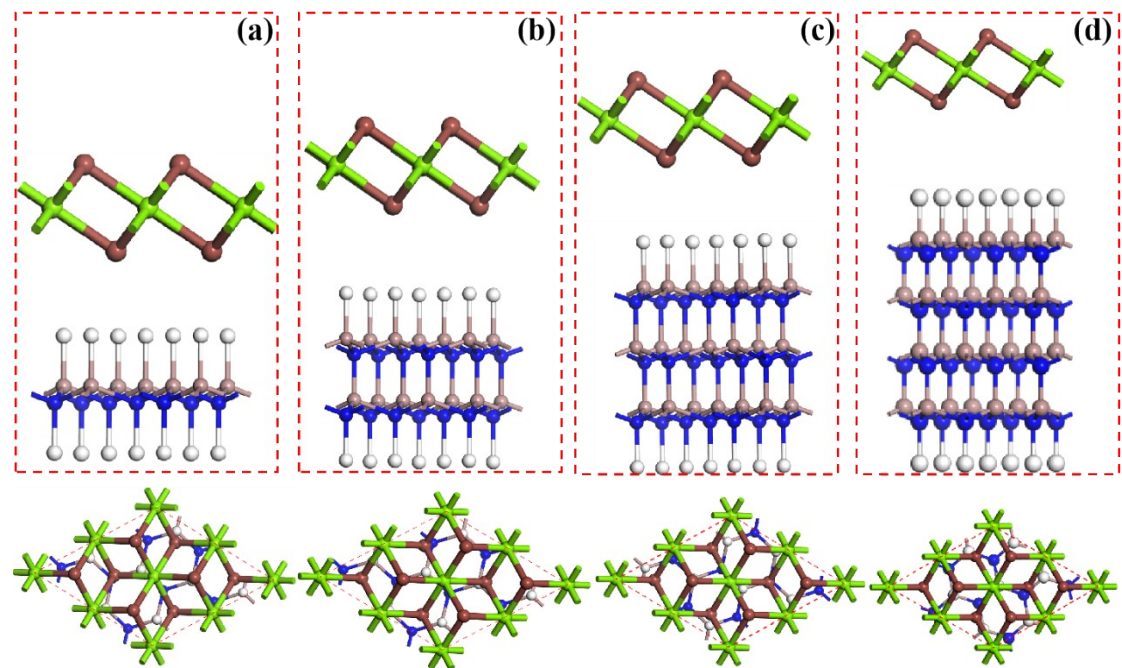

**Figure S3.** The different stacking patten of MgI<sub>2</sub>/Ga-GaN heterostructures with the thickness of GaN layer in (a) monolayer, (b) bilayer, (c) trilayer and(d) tetralayer.

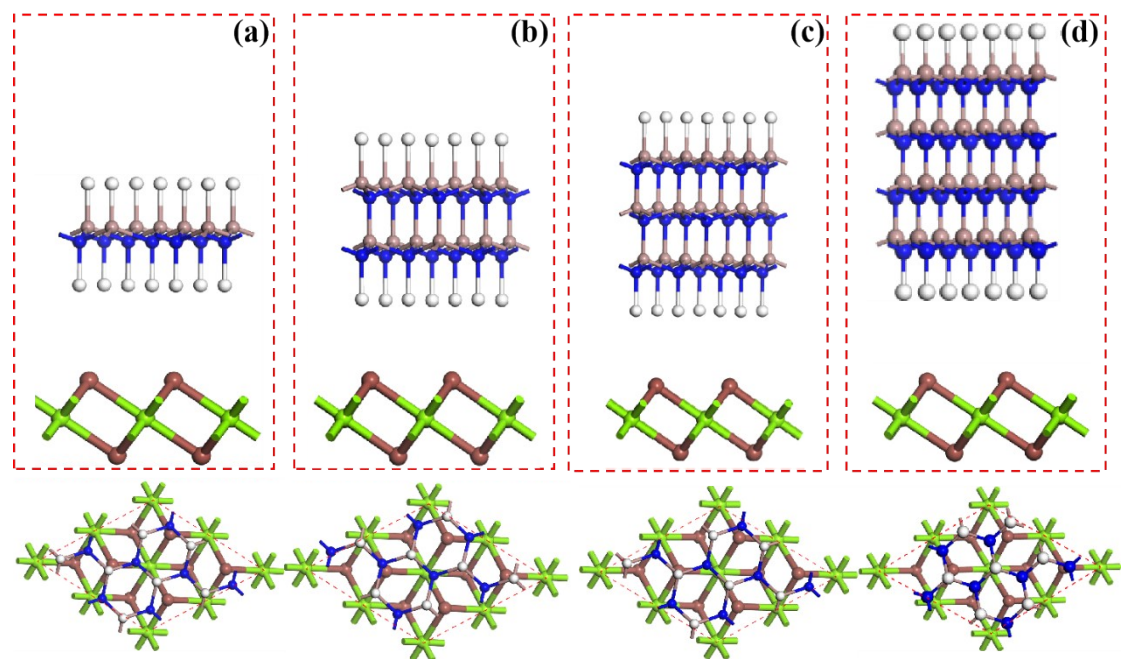

**Figure S4.** the different stacking patten of MgI<sub>2</sub>/N-GaN heterostructures with the thickness of GaN layer in (a) monolayer, (b) bilayer, (c) trilayer and(d) tetralayer.

#### S4. Electrostatic potential distributions of 2D $\text{MgI}_2/\text{GaN}$ heterostructures

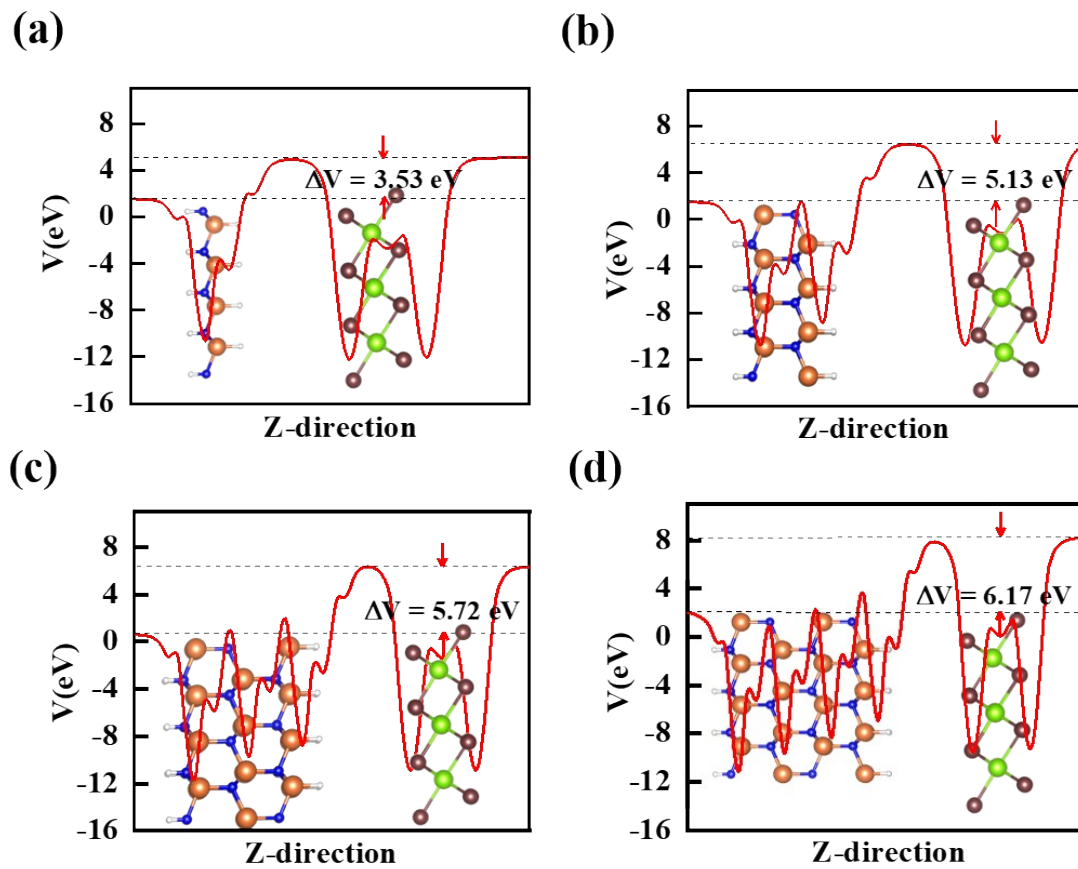

**Figure S5.** Electrostatic potential distribution ( $V$ ) of  $\text{MgI}_2/\text{Ga-N}$  heterostructures with the thickness of GaN layer in (a) monolayer, (b) bilayer, (c) trilayer and (d) tetralayer.  $\Delta V$  is the electrostatic potential difference between two terminations of the heterostructures.

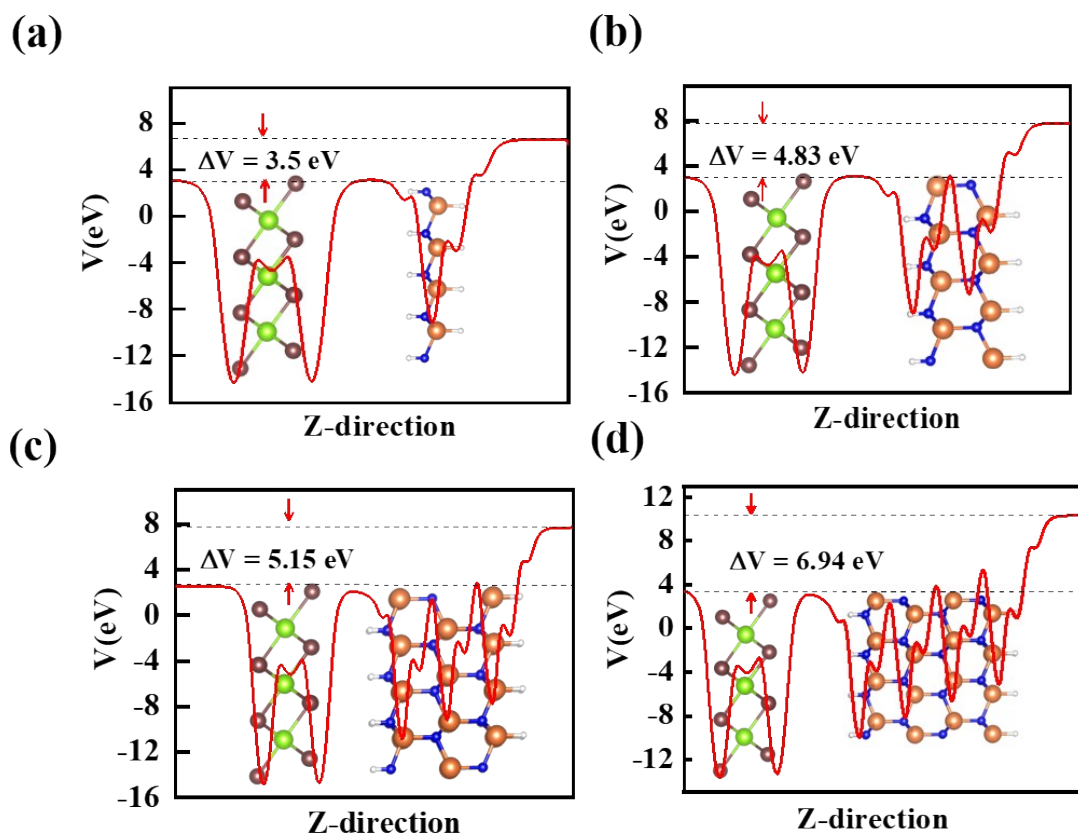

**Figure S6.** Electrostatic potential distribution ( $V$ ) of  $\text{MgI}_2/\text{N-GaN}$  heterostructures with the thickness of GaN layer in (a) monolayer, (b) bilayer, (c) trilayer and (d) tetralayer.  $\Delta V$  is the electrostatic potential difference between two terminations of the heterostructure.

**S5. The charge-density isosurface distributions of CBM and VBM states of  $\text{MgI}_2/\text{GaN}$  heterostructures**

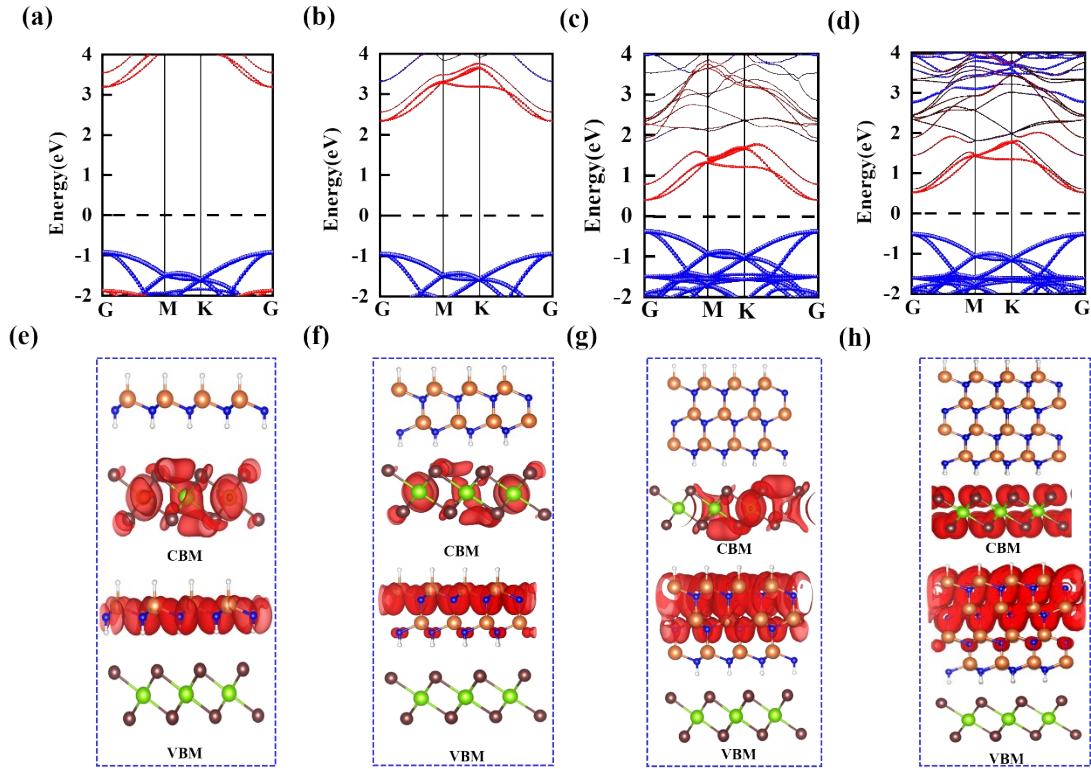

**Figure S7.** Projected band structure of N-GaN/ $\text{MgI}_2$  heterostructures with the different GaN layers in (a) 1L, (b) 2L, (c) 3L, and (d) 4L.  $\text{MgI}_2$  and GaN contributions to the heterostructures are represented by the red and blue balls, separately. The dashed lines indicate the Fermi level. CBM and VBM charge-density isosurfaces in 2D  $\text{MgI}_2/\text{N-GaN}$  heterostructures with GaN layer thickness in (e) 1L, (f) 2L, (g) 3L, and (h) 4L.

**S6. Calculation of projected energy bands of deformed  $\text{MgI}_2\text{-GaN}$  heterojunctions by HSE method**

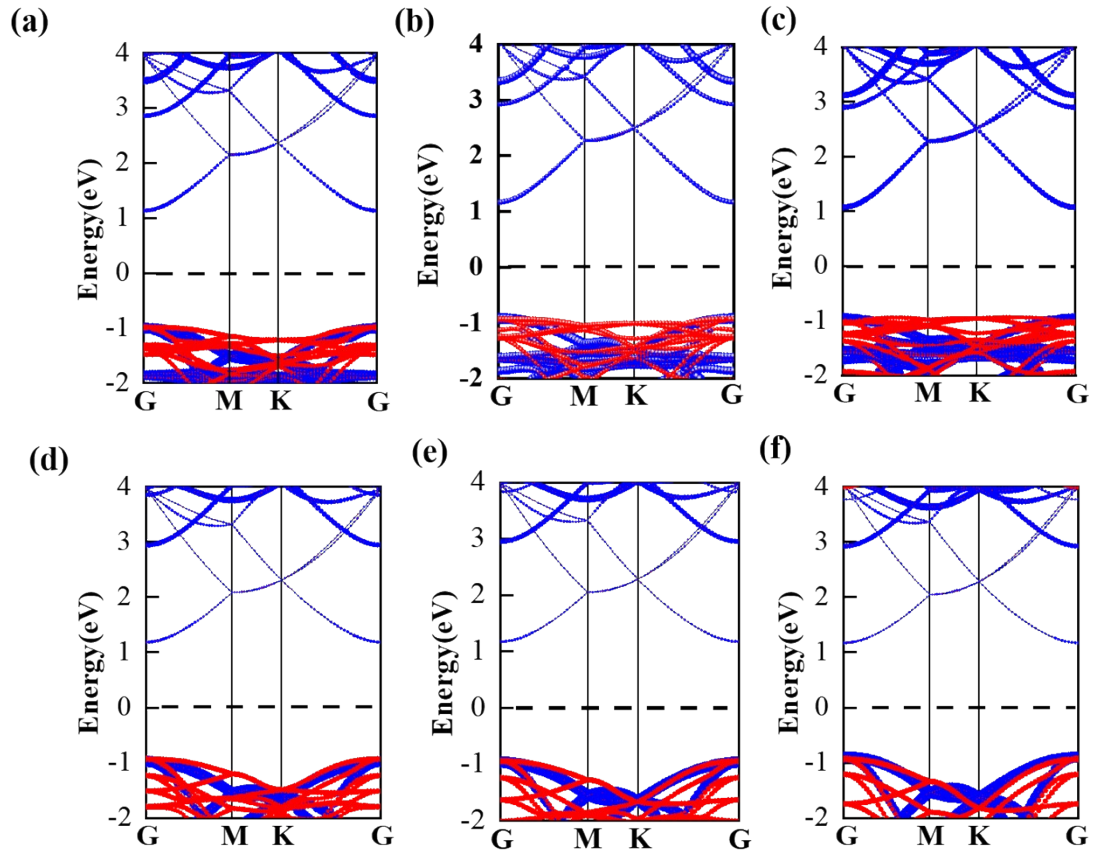

**Figure S8.** (a-c) Electronic band structures of 3L-Ga-GaN/MgI<sub>2</sub> under the effect of tensile strain, and (d-f) band structures due to compressive strain. Dashed black lines set to zero represent Fermi level.
